# Supplementary material
Source: PubMed Central journal article supplement (PMC3141925)
Supplement: 1018213108_pnas.1018213108_SI.pdf [file 1018213108_pnas.1018213108_SI.pdf]

# Supporting Information

García-López et al. 10.1073/pnas.1018213108

## SI Material and Methods.

**Luciferase Assay.** Two-day-old flies were fed 250  $\mu\text{M}$  ABP1 or 0.12% DMSO (1). Luciferase activity was measured according to the Luciferase Assay System (Promega) protocol with a Victor Wallac 1420 Multilabel Counter (Perkin Elmer Lifesciences), with minor modifications.

**Reverse Transcription-PCR.** Total RNA was extracted from approximately 30 whole flies or mouse hind limb TA (approximately 40 mg) with TriReagent (Sigma). Reverse transcription, primer sequences, and PCR conditions are described (Table S3 and ref. 1).

**RNA Synthesis.** CUG60 was synthesized by subcloning 60 CTG repeats (2) into pBlueScript II SK (+/-). Linearized plasmid (1  $\mu\text{g}$ ) was transcribed using the T7 promoter (MEGAscript kit, Ambion). Other RNAs were purchased from Metabion (Table S3).

**Peptide Synthesis and Purification.** Synthesis employed solid-phase N-(9-fluorenyl) methoxycarbonyl chemistry. Purification employed preparative reversed-phase high-pressure liquid chromatography with a mediterranea sea (3) column (Teknokroma).

1. Garcia-Lopez A, et al. (2008) Genetic and chemical modifiers of a CUG toxicity model in *Drosophila*. *PLoS One* 3:e1595.
2. Miller JW, et al. (2000) Recruitment of human muscleblind proteins to (CUG)<sub>n</sub> expansions associated with myotonic dystrophy. *EMBO J* 19:4439–4448.

Identification employed matrix-assisted laser desorption ionization-time-of-flight mass spectrometry with a 4700 Proteomics Analyzer (Applied Biosystems).

**Circular Dichroism.** CUG60 spectra of RNA (1  $\mu\text{M}$  in binding buffer), incubated with different concentrations of ABP1 or MbIZF were measured (10 measurements averaged) at 10 °C with a J-810 spectropolarimeter (Jasco).

**Toxicity in Wild-Type Mice.** Peptide (0.5  $\mu\text{g}$ , 1  $\mu\text{g}$ , 10  $\mu\text{g}$ , and 100  $\mu\text{g}$  in saline) was injected intramuscularly into the right TA of five-week-old *FVB* mice ( $n = 6$  per group). Animals were sacrificed one month later, and total blood from the heart was analyzed using standard toxicity assays.

**Statistics.** Two-tailed Student's *t* tests were used for comparisons between two samples ( $\alpha = 0.05$ ). Multiple-comparisons of PS-SCL screen results were described (1) ( $\alpha = 0.05$ ). GraphPad Prism 5 software was used for comparing regression slopes in the tryptophan quenching experiments.

3. Mulders SA, et al. (2009) Triplet-repeat oligonucleotide-mediated reversal of RNA toxicity in myotonic dystrophy. *Proc Natl Acad Sci USA* 106:13915–13920.

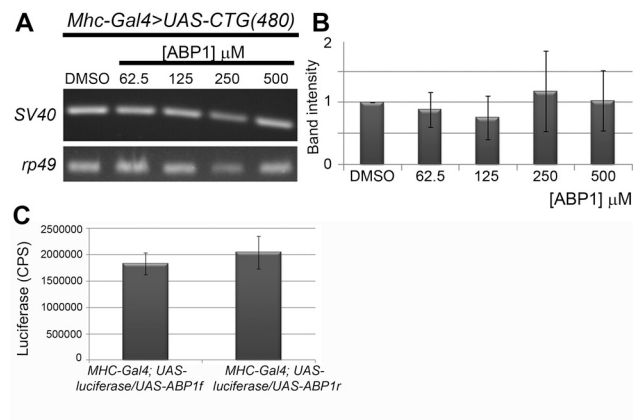

**Fig. S1.** ABP1 does not affect the levels of *i(CUG)*<sub>480</sub> transcripts. (A) Semiquantitative RT-PCR of flies expressing *i(CUG)*<sub>480</sub> in the fly musculature fed with different concentrations of ABP1. (B) Statistical analysis of the intensity of the bands (normalized to *rp49* and to DMSO) did not reveal significant differences between DMSO-treated and peptide-treated flies ( $\alpha = 0.05$ , Student's *t* test). PCRs were performed with 30 cycles. *rp49* was used as a cDNA template loading control. (C) ABP1r transgenic expression did not reduce the expression of Luciferase reporter compared to ABP1f. Importantly, ABP1r suppressed *i(CUG)*<sub>480</sub>-induced phenotypes in the fly eye and muscle, whereas ABP1f did not. The average Luciferase light emission is shown for 24 replicates.

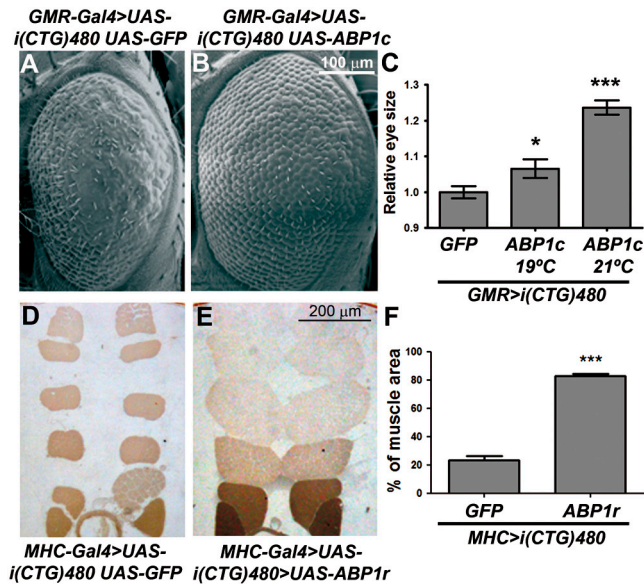

**Fig. 52.** Transgenic expression of ABP1 using the Gal4/UAS system suppressed *i(CTG)<sub>480</sub>* toxicity. (A and B) Representative scanning electron micrographs of *Drosophila* eyes after coexpression of (A) *UAS-i(CTG)<sub>480</sub>* and *UAS-green fluorescent protein* (GFP; control) or (B) *UAS-i(CTG)<sub>480</sub>* and *UAS-ABP1c* at 21 °C ( $n = 9$ ) with the *GMR-Gal4* driver. Expression of *UAS-i(CTG)<sub>480</sub>* caused roughness and reduced eye size. This was significantly reversed with *UAS-ABP1c* expression at 19 °C and 21 °C (C). Five independent *UAS-ABP1r* or *UAS-ABP1c* transgenic lines showed similar effects. (D and E) Representative bright field microscopy images of transversal sections of resin-embedded adult IFM of *MHC-Gal4 Drosophila* after coexpression of *UAS-i(CTG)<sub>480</sub>* and *UAS-GFP* (control) or *UAS-i(CTG)<sub>480</sub>* and *UAS-ABP1r* (or *UAS-ABP1c*). ABP1 expression suppressed histological defects in the IFM causing a 3.5-fold increase in muscle area ( $n = 7$ ; F).

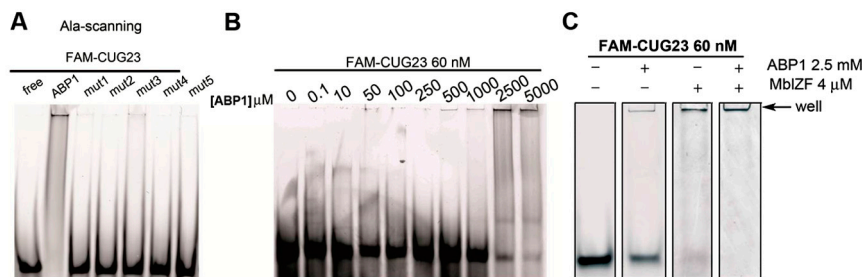

**Fig. 53.** RNA binding and specificity of ABP1. (A) Electrophoretic mobility shift assay showing that mutant derivatives of ABP1, by alanine scanning mutagenesis (2.5 mM), did not bind to CUG-repeat RNA (60 nM). (B) A similar experiment showed that ABP1 binding to FAM-CUG23 (60 nM) responded to peptide concentration, starting between 250–500 μM. The binding increased proportionally to the peptide concentration. (C) Coaddition of ABP1 and MblZF did not increase the amount of free RNA compared to ABP1 or MblZF alone (lane 4 compared to lanes 2 and 3, respectively). In contrast, the binding of ABP1 and MblZF to the CUG RNA seemed to be additive. However, because in all cases the complexes formed got retained in the well no firm conclusions could be drawn from these experiments. Note that high concentrations of peptide (or MblZF protein) were needed in all fluorescent electrophoretic mobility gel shift assays to detect binding to the CUG RNAs, which may account for the high molecular weight complexes formed upon interaction that were retained in the well of the gels, as similarly described in other unrelated studies (1). Because in our nonfluorescent experiments an RNA:peptide molar ratio lower than 1:1 was sufficient to detect interaction it is possible that the fluorophore used in our fluorescent assays hindered the binding. Supporting this notion, Nt conjugation of ABP1 with carboxyfluorescein completely abolished the ability of the peptide to bind CUG-repeat RNA.

1 Ingmer H, Fong EL, Cohen SN (1995) Monomer-dimer equilibrium of the pSC101 RepA protein. *J Mol Biol* 250:309–314.



**Table S1. List of defined hexapeptides obtained by deconvolution of the PS-SCL**

| Sequence             | Concentration assayed | Emerged treated/emerged control |
|----------------------|-----------------------|---------------------------------|
| Ac-cpyaqe-NH2        | 80 µM                 | 0,3*                            |
| Ac-cpyawe-NH2        | 80 µM                 | -                               |
| Ac-cpytqe-NH2        | 80 µM                 | 0,8                             |
| Ac-cpytwe-NH2        | 62 µM                 | -                               |
| Ac-cqyaqe-NH2        | 25 µM                 | 2,0                             |
| Ac-cqyawe-NH2        | 25 µM                 | -                               |
| Ac-cqytqe-NH2        | 80 µM                 | 1,4                             |
| Ac-cqytwe-NH2        | 57 µM                 | 0,9                             |
| Ac-ppyaqe-NH2        | 80 µM                 | 2,0                             |
| Ac-ppyawe-NH2 (ABP1) | 80 µM                 | 4,0*                            |
| Ac-ppytqe-NH2        | 80 µM                 | 0,8                             |
| Ac-ppytwe-NH2        | 80 µM                 | 3,0                             |
| Ac-pqyaqe-NH2        | 80 µM                 | 0,8                             |
| Ac-pqyawe-NH2        | 40 µM                 | 1,8                             |
| Ac-pqytqe-NH2        | 40 µM                 | 0,5                             |
| Ac-pqytwe-NH2        | 38.5 µM               | 0,4                             |

The 16 peptides were tested at the highest concentration possible depending on the percentage of DMSO the stocks were diluted in. Two peptides showed significant differences in the number of emerged females compared to DMSO-treated controls: Ac-cpyaqe-NH2 (that enhanced the phenotype) and Ac-ppyawe-NH2 (ABP1, that suppressed it). "-" indicates the number of emerged females was 0 in treated tubes and controls.

\**p*-value < 0.05

**Table S2. Peptides generated by alanine scanning mutagenesis**

| Name | Sequence      |
|------|---------------|
| mut1 | Ac-ppyawa-NH2 |
| mut2 | Ac-ppyaae-NH2 |
| mut3 | Ac-ppaawe-NH2 |
| mut4 | Ac-payawe-NH2 |
| mut5 | Ac-apyawe-NH2 |

The five peptides were tested in vivo at the highest concentration possible depending on the percentage of DMSO the stocks were diluted in.



**Table S4. Toxicity analysis of ABP1 from FVB mice blood samples**

|               | Ref.   | DMSO 0.2%    | ABP1 0.5 µg  | ABP1 1 µg    | DMSO 2%      | ABP1 10 µg   | ABP1 100 µg * |
|---------------|--------|--------------|--------------|--------------|--------------|--------------|---------------|
| <b>Kidney</b> |        |              |              |              |              |              |               |
| Bile acids †  | <15    | 3.4 ± 0.4    | 3.7 ± 0.5    | 4.7 ± 0.9    | 2.9 ± 0.3    | 4.8 ± 0.7    | 3.3 ± 0.3     |
| Urea†         | 17–28  | 45.2 ± 9.6 † | 46.6 ± 4.9 † | 36.1 ± 1.2 † | 38.7 ± 4.6 † | 54.2 ± 3.2 * | 52.0 ± 3.3 *  |
| Creatinine †  | 0.3–1  | 0.3 ± 0.0    | 0.3 ± 0.0    | 0.2 ± 0.0    | 0.2 ± 0.0    | 0.3 ± 0.0    | 0.3 ± 0.0     |
| <b>Muscle</b> |        |              |              |              |              |              |               |
| CPK §         | 50–500 | 203 ± 43     | 77.0 ± 18    | 40.5 ± 25    | 4923 ± 2012‡ | 4937 ± 1384‡ | 2461 ± 1036‡  |
| <b>Liver</b>  |        |              |              |              |              |              |               |
| FA §          | 45–222 | 400 ± 25 †   | 399 ± 21 †   | 326 ± 15 †   | 371 ± 32 †   | 297 ± 16 †   | 343 ± 27 †    |
| GGT §         | 0–12   | 1.0 ± 0.0    | 1.0 ± 0.0    | 1.6 ± 0.4    | 2.1 ± 0.5    | 0.7 ± 0.1    | 1.3 ± 0.4     |
| GPT §         | 26–77  | 67.0 ± 7.0   | 67.2 ± 6.0   | 60.6 ± 7.1   | 70.3 ± 16.3  | 143 ± 32.4 * | 75.7 ± 7.8    |

Toxicity of ABP1 on wild-type mice of the FVB strain was assessed by performing intramuscular injection of 0.5 µg, 1 µg (in 0.2% DMSO), 10 µg and 100 µg (in 2% DMSO) or saline with the corresponding amount of DMSO (controls) in the right hind limb *tibialis anterioris* (TA). Two out of five animals died 11 days after injection of 100 µg (†), which yields a dose close to the LD50. Injection of 10 µg caused mild alterations in kidney and liver functions (indicating that ABP1 was able to enter the blood stream) but did not affect muscle histology. Injection of 0.5 µg and 1 µg did not cause toxicity beyond DMSO effects. In all cases a visual autopsy of the animals was performed upon sacrifice, and no evident abnormalities were detected.

\*Values higher than the respective DMSO controls.

†mcmol/L.

‡Values higher than the reference.

§U/L.

**Table S5. Summary of the effect of ABP1 on DM1 phenotypes in HSA<sup>LR</sup> mice**

| Dose 0.5 µg |                          | Dose 10 µg |                          |                                   |                                   |                               |
|-------------|--------------------------|------------|--------------------------|-----------------------------------|-----------------------------------|-------------------------------|
| Mouse       | Histological improvement | Mouse      | Histological improvement | <i>Serca</i> splicing improvement | <i>Tnnt3</i> splicing improvement | <i>Clcn1</i> protein recovery |
| 0.5_1       | Yes ( $p = 0.007$ )      | 10_1       | Yes ( $p = 0.020$ )      | No ( $p = 0.541$ )                | Yes                               | Yes                           |
| 0.5_2       | Yes ( $p = 0.048$ )      | 10_2       | Yes ( $p = 0.040$ )      | Yes ( $p = 0.038$ )               | Yes                               | Yes                           |
| 0.5_3       | Yes ( $p = 0.008$ )      | 10_3       | Yes ( $p = 0.006$ )      | Yes ( $p = 0.013$ )               | Yes                               | Yes                           |
| 0.5_4       | No ( $p = 0.430$ )       | 10_4       | No ( $p = 0.491$ )       | Yes ( $p = 0.025$ )               | Yes                               | Yes                           |
| 0.5_5       | No ( $p = 0.191$ )       | 10_5       | No ( $p = 0.890$ )       | No ( $p = 0.720$ )                | No                                | No                            |

The effect of ABP1 intramuscular injection was studied in five five-week-old gender-matched HSA<sup>LR</sup> mice. In every animal except #5, at least three out of the four phenotypes analyzed were reverted upon ABP1 treatment (10 µg; 1 month *a/i*) compared to the contralateral, DMSO-treated limb.
